# Supplementary material for: The wtf4 meiotic driver utilizes controlled protein aggregation to generate selective cell death
Source: eLife. 2020 Oct 27;9:e55694. doi: 10.7554/eLife.55694 (PMC7591262; doi:10.7554/eLife.55694)
Supplement: Supplementary file 1. — Column 1 is the name of strain used, while column 2 refers to the species of the yeast (Sp = S. pombe; Sc = S. cerevisiae). Columns 3 lists the reference for the yeast strain. If it was made in this study, we also detail how the strain was made in column 5. Column 6 lists which figures the yeast strain was used in. [file elife-55694-supp1.xlsx]

## Sheet: Yeast_smaller (2)
yeast strains used
strain	species	genotype	reference	construction:	used in figure (Fig)
DY11856	Sp	h-; leu1-32::tdh1-YFP(leu1+); cpy1-mCherry::hphMX; CFP-atg8::leu1+	L. Sung et al., 2013	____	strain construction
GP1163	Sp	h-, ade6-52, leu1-32, his5-303	from Gerry Smith Lab	____	strain construction
GP282	Sp	h-, his5-303	from Gerry Smith Lab	____	strain construction
GP850	Sp	h+, ura1-61, lys3-37	from Gerry Smith Lab	____	strain construction
GP3637	Sp	h+, rec12-169::3HA6His-kanmx4, ade6-M210, lys1-37, ura4-D18	from Gerry Smith Lab	____	strain construction
SLJ3340	Sc	MATa, ura3-1, his3-11,15, leu2-3,112, trp1-1, ade2-, lys2-, htb2-mCherry::hphMX4	from Sue Jaspersen Lab	____	strain construction
SLJ769	Sc	MATa, ura3-1, his3-11,15, leu2-3,112, trp1-1, ADE2, LYS2	from Sue Jaspersen Lab	____	strain construction
SO4857	Sp	mid1-GFP::ura4+; pBip1-mCherry-AHDL::leu1+ ura4-D18; leu1-32; ade6-x	Zhang et al., 2012	____	strain construction
SZY13	Sp	WT S. kambucha	Singh and Klar, 2002	____	strain construction
SZY44	Sp	h-, lys4-95	Nuckolls et al., 2017	____	strain construction, Fig 1-Fig Supp 2C
SZY504	Sp	h?, lys1-37, ade6-m210	this study	from a cross between GP1163 and GP282	strain construction
SZY643	Sp	h90, leu1-32, ura4-D18	Nuckolls et al., 2017	____	strain construction
SZY926	Sp	h90, leu1-32, ura4-D18, ade6-::G418::ade6-	this study	SZY643 + pSZB188*	strain construction
SZY960	Sp	h90, leu1-32, ura4-D18, ade6-::wtf4-GFP::kanmx4::ade6-	Nuckolls et al., 2017	____	Fig 1D; Fig 1G; Fig 1-Fig Supp 4A
SZY1008	Sp	h90, leu1-32, ade6-::G418::ade6-	this study	from a cross between GP850 and SZY926	strain construction
SZY1030	Sp	hht1-mRFP::kanmx4, lys1-37	Nuckolls et al., 2017	____	Fig 1G; Fig 1-Fig Supp 5A-B
SZY1049	Sp	h90, leu1-32, ura4-D18, ade6-::wtf4poison-GFP::kanMX4::ade6-	Nuckolls et al., 2017	____	Fig 1C; Fig 1-Fig Supp 1B; Fig 5-Fig Supp 3
SZY1099	Sp	h90, ura4-D18, leu1-32, ade6-::wtf4-GFP::kanmx4::ade6-; pbip1-mCherry-AHDL::leu1+	this study	from a cross between SZY960 and SO4857	Fig 1-Fig Supp 2C
SZY1130	Sp	h90, leu1-32, ura4-D18, cpy1-mCherry::hphMX	this study	from a cross between DY11856 and SZY643	Fig 1D; Fig 1-Fig Supp 2A
SZY1142	Sp	h90, ura4-d18, his5Δ::ade6+, lys1-37, ade6-::mCherry-wtf4::kanmx4::ade6-	Nuckolls et al., 2017	____	Fig 1C; Fig 1-Fig Supp 1B
SZY1277	Sp	h-, his+:sec63-YFP, leu1-32, ade6-m210	this study	see methods	strain construction
SZY1637	Sc	MATa, ura3-1, his3-11,15, leu2-3,112, trp1-1, PACT1-LexA-ER-haB42::HIS3	this study	see methods	strain construction
SZY1766	Sc	MATa, ura3-1, his3-11,15, leu2-3,112, trp1-1, PACT1-LexA-ER-haB42::HIS3, [LexA-wtf4poison-GFP::URA3], [Empty Vector::TRP1]	this study	SZY1637 + [pSZB585] + [pRS314]	Fig 2A-B; Fig 2-Fig Supp 2A; Fig 4- Fig Supp 3
SZY1815	Sc	MATa, ura3-1, his3-11,15, leu2-3,112, trp1-1, PACT1-LexA-ER-haB42::HIS3, [LexA-wtf4antidote::TRP1], [Empty Vector::URA3]	this study	SZY1637 + [pSZB589] + [pRS316]	Fig 2-Fig Supp 2A
SZY1818	Sc	MATa, ura3-1, his3-11,15, leu2-3,112, trp1-1, PACT1-LexA-ER-haB42::HIS3, [LexA-wtf4poison-GFP::URA3], [LexA-wtf4antidote::TRP1]	this study	SZY1637 + [pSZB585] + [pSZB589]	Fig 2-Fig Supp 2; Fig 4A-B; Fig 4-Fig Supp 1; Fig 4-Fig Supp 2B
SZY1821	Sc	MATa, ura3-1, his3-11,15, leu2-3,112, trp1-1, PACT1-LexA-ER-haB42::HIS3, [Empty Vector::URA3], [Empty Vector::TRP1]	this study	SZY1637 + [pRS314] + [pRS316]	Fig 2A; Fig 2-Fig Supp 2A; Fig 2-Fig Supp 3; Fig 2- Fig Supp 4B; Fig 3B; Fig 4C; Fig 4-Fig Supp 1B; Fig 4-Fig Supp 2A
SZY1952	Sc	MATa, ura3-1, his3-11,15, leu2-3,112, trp1-1, PACT1-LexA-ER-haB42::HIS3, [Empty Vector::URA3], [LexA-wtf4antidote-mCherry::TRP1]	this study	SZY1637 + [pRS316] + [pSZB708]	Fig 2A, Fig 2C, Fig 4-Fig Supp 2D
SZY1954	Sc	MATa, ura3-1, his3-11,15, leu2-3,112, trp1-1, PACT1-LexA-ER-haB42::HIS3, [LexA-wtf4poison-GFP::URA3], [LexA-wtf4antidote-mCherry::TRP1]	this study	SZY1637 + [pSZB585] + [pSZB708]	Fig 2A, 2D, and 2F; Fig 2-Fig Supp 1E and 1F; Fig 2- Fig Supp 3
SZY2059	Sc	MATa, ura3-1, his3-11,15, leu2-3,112, trp1-1, PACT1-LexA-ER-haB42::HIS3, [LexA-wtf4antidote-mEOS::URA3], [EmptyVector::TRP1]	this study	SZY1637 + [pSZB668] + [pSZB756]	Fig 2-Fig Supp 4B-C
SZY2070	Sc	MATa, ura3-1, his3-11,15, leu2-3,112, trp1-1, PACT1-LexA-ER-haB42::HIS3, [LexA-wtf4antidote-mEOS::URA3], [LexA-wtf4poison-mEOS::TRP1]	this study	SZY1637 + [pSZB732] + [pSZB756]	Fig 2-Fig Supp 4B-C
SZY2072	Sc	MATa, ura3-1, his3-11,15, leu2-3,112, trp1-1, PACT1-LexA-ER-haB42::HIS3, [LexA-wtf4poison-mEOS::TRP1], [EmptyVector::URA3]	this study	SZY1637 + [pSZB732] + [pRS316]	Fig 2-Fig Supp 4B-C
SZY2080	Sp	h90, leu1-32	this study	selected for popouts of plasmid from SZY1008	Fig 1-Fig Supp 3A

## Sheet: Yeast_smaller (3)
yeast strains used
strain	species	genotype	reference	construction:	used in figure (Fig)
SZY2103	Sc	MATa, ura3-1, his3-11,15, leu2-3,112, trp1-1, PACT1-LexA-ER-haB42::HIS3, [Empty Vector::URA3], [LexA-wtf4antidote*-mCherry::TRP1]	this study	SZY1637 + [pSZB774] + [pRS316]	Fig 3B, Fig 3-Fig Supp 1B
SZY2109	Sc	MATa, ura3-1, his3-11,15, leu2-3,112, trp1-1, PACT1-LexA-ER-haB42::HIS3, [LexA-wtf4poison-GFP::URA3], [LexA-wtf4antidote*-mCherry::TRP1]	this study	SZY1637 + [pSZB585] + [pSZB774]	Fig 3B and 3D
SZY2159	Sc	MATa, ura3-1, his3-11,15, leu2-3,112, trp1-1, PACT1-LexA-ER-haB42::HIS3, [LexA-wtf4poison-mEOS::TRP1], [LexA-wtf4antidote::URA3]	this study	SZY1637 + [pSZB782] + [pSZB732]	Fig 2-Fig Supp 4B-C
SZY2424	Sc	MATa, ura3-1, his3-11,15, leu2-3,112, trp1-1, PACT1-LexA-ER-haB42::HIS3, [LexA-wtf4poison*-GFP::URA3], [Empty Vector::TRP1]	this study	SZY1637 + [pSZB786] + [pSZB668]	Fig 3B, Fig 3-Fig Supp 1A
SZY2426	Sc	MATa, ura3-1, his3-11,15, leu2-3,112, trp1-1, PACT1-LexA-ER-haB42::HIS3, [LexA-wtf4poison*-GFP::URA3], [LexA-wtf4antidote*-mCherry::TRP1]	this study	SZY1637 + [pSB774] + [pSZ786]	Fig 3B-C
SZY2539	Sc	MATa, ura3-1, his3-11,15, leu2-3,112, trp1-1, vps1Δ::kanmx4	this study	see methods	Fig 5C
SZY2552	Sc	MATa, ura3-1, his3-11,15, leu2-3,112, trp1-1, vps1Δ::kanmx4, PACT1-LexA-ER-haB42::HIS3	this study	SZY2539 + FRP718*	Fig 5C
SZY2564	Sc	MATa, ura3-1, his3-11,15, leu2-3,112, trp1-1, vps1Δ::kanmx4, PACT1-LexA-ER-haB42::HIS3, [Empty Vector::URA3], [Empty Vector::TRP1]	this study	SZY2552 + [pSZB668] + [pSZB670]	Fig 5C
SZY2566	Sc	MATa, ura3-1, his3-11,15, leu2-3,112, trp1-1, vps1Δ::kanmx4, PACT1-LexA-ER-haB42::HIS3, [LexA-wtf4poison-GFP::URA3], [Empty Vector::TRP1]	this study	SZY2552 + [pSZB668] + [pSZB585]	Fig 5C
SZY2568	Sc	MATa, ura3-1, his3-11,15, leu2-3,112, trp1-1, vps1Δ::kanmx4, PACT1-LexA-ER-haB42::HIS3, [Empty Vector::URA3], [LexA-wtf4antidote-mCherry::TRP1]	this study	SZY2552 + [pSZB670] + [pSZB708]	Fig 5C
SZY2570	Sc	MATa, ura3-1, his3-11,15, leu2-3,112, trp1-1, vps1Δ::kanmx4, PACT1-LexA-ER-haB42::HIS3, [LexA-wtf4poison-GFP::URA3], [LexA-wtf4antidote-mCherry::TRP1]	this study	SZY2552 + [pSZB585] + [pSZB708]	Fig 5C-E, Fig 5-Fig Supp 5A
SZY2650	Sc	MATa, ura3-1, his3-11,15, leu2-3,112, trp1-1, PACT1-LexA-ER-haB42::HIS3, [LexA-wtf4poison*-GFP::URA3], [LexA-wtf4antidote-mCherry::TRP1]	this study	SZY1637 +[pSZB786] + [pSZB708]	Fig 3B and 3E
SZY2690	Sp	h90, leu1-32::leu1+:adh1pr:Z3EV	this study	see methods	strain construction
SZY2731	Sc	MATa, ura3-1, his3-11,15, leu2-3,112, trp1-1, PACT1-LexA-ER-haB42::HIS3, [Empty Vector::URA3], [Empty Vector::TRP1], [LexA-RNQ1-mCardinal::LEU2]	this study	SZY1821 + [pSZB942]	Fig 4-Fig Supp 2E
SZY2733	Sc	MATa, ura3-1, his3-11,15, leu2-3,112, trp1-1, PACT1-LexA-ER-haB42::HIS3, [LexA-wtf4poison-GFP::URA3], [LexA-wtf4antidote-mCherry::TRP1], [LexA-RNQ1-mCardinal::LEU2]	this study	SZY1954 + [pSZB942]	Fig 5A, Fig 5-Fig Supp 1A-C
SZY2735	Sc	MATa, ura3-1, his3-11,15, leu2-3,112, trp1-1,PACT1-LexA-ER-haB42::HIS3, [LexA-wtf4poison-GFP::URA3], [Empty Vector::TRP1], [LexA-RNQ1-mCardinal:LEU2]	this study	SZY1766 + [pSZB942]	Fig 5-Fig Supp 1D
SZY2740	Sp	h90, leu1-32::LEU1:adh1pr:Z3EV, lys4-::LexA-wtf4antidote-mCherry::hphmx6::lys4-	this study	SZY2690 + pSZB892*	Fig 1F
SZY2878	Sc	MATa, ura3-1, his3-11,15, leu2-3,112, trp1-1, vps1Δ::kanmx4, PACT1-LexA-ER-haB42::HIS3, [LexA-wtf4poison-GFP::URA3], [LexA-wtf4antidote-mCherry::TRP1], [LexA-RNQ1-mCardinal::LEU2]	this study	SZY2570 + [pSZB942]	Fig 5-Fig Supp 5B
SZY2884	Sp	h90, leu1-32::leu1+:adh1pr:Z3EV,ura4-::Empty Vector::kanmx4::ura4-	this study	SZY2690 + pSZB331*	Strain construction
SZY2888	Sp	h90, leu1-32::leu1+:adh1pr:Z3EV, lys4-::LexA-wtf4antidote-mCherry::hphmx6::lys4-, ura4-::LexA-wtf4poison-GFP::kanmx4::ura4-	this study	SZY2740 + pSZB975*	Fig 1E, Fig 1-Fig Supp 3D
SZY2892	Sp	h90, leu1-32::leu1+:adh1pr:Z3EV, lys4-::Empty Vector::hphmx6::lys4-, ura4-::Empty Vector::kanmx4::ura4-	this study	SZY2884 + pSZB322*	Fig 1-Fig Supp 3A
SZY2956	Sc	MATa, ura3-1, his3-11,15, leu2-3,112, trp1-1, PACT1-LexA-ER-haB42::HIS3, [LexA-wtf4poison-GFP::URA3], [Empty Vector::TRP1], [pGAL-HSP104::LEU2]	this study	see methods	strain construction
SZY2958	Sc	MATa, ura3-1, his3-11,15, leu2-3,112, trp1-1, PACT1-LexA-ER-haB42::HIS3, [LexA-wtf4poison-GFP::URA3], [Empty Vector::TRP1], [pGAL-HSP104::LEU2]	this study	see methods	strain construction
SZY2977	Sc	MATa, ura3-1, his3-11,15, leu2-3,112, trp1-1, PACT1-LexA-ER-haB42::HIS3, [LexA-wtf4poison-GFP::URA3], [Empty Vector::TRP1], [Empty Vector::LEU2]	this study	SZY1766 + [pRS315]	strain construction
SZY3116	Sc	MATa, ura3-1, his3-11,15, leu2-3,112, trp1-1, PACT1-LexA-ER-haB42::HIS3, [pGAL-SIS1::URA3]	this study	see methods	strain construction
SZY3118	Sc	MATa, ura3-1, his3-11,15, leu2-3,112, trp1-1, PACT1-LexA-ER-haB42::HIS3, [pGAL-JJJ2::URA3]	this study	SZY1637 + pSZB1021	strain construction

## Sheet: Yeast_smaller
yeast strains used
strain	species	genotype	reference	construction:	used in Figure:
SZY3120	Sc	MATa, ura3-1, his3-11,15, leu2-3,112, trp1-1, PACT1-LexA-ER-haB42::HIS3, [pGAL-YDJ1::URA3]	this study	SZY1637 + pSZB1020	strain construction
SZY3122	Sc	MATa, ura3-1, his3-11,15, leu2-3,112, trp1-1, PACT1-LexA-ER-haB42::HIS3, [pGAL-HSP42::URA3]	this study	SZY1637 + pSZB1024	strain construction
SZY3124	Sc	MATa, ura3-1, his3-11,15, leu2-3,112, trp1-1, PACT1-LexA-ER-haB42::HIS3, [pGAL-HSP82::URA3]	this study	SZY1637 + pSZB1023	strain construction
SZY3126	Sc	MATa, ura3-1, his3-11,15, leu2-3,112, trp1-1, PACT1-LexA-ER-haB42::HIS3, [pGAL-HSC82::URA3]	this study	SZY1637 + pSZB1022	strain construction
SZY3175	Sc	MATa, ura3-1, his3-11,15, leu2-3,112, trp1-1, PACT1-LexA-ER-haB42::HIS3, HDEL-DsRed::TRP1	this study	SZY1637 + pSJ883*	strain construction
SZY3177	Sc	MATa, ura3-1, his3-11,15, leu2-3,112, trp1-1, PACT1-LexA-ER-haB42::HIS3, HDEL-DsRed::TRP1, [LexA-wtf4poison-GFP::URA3]	this study	SZY3175 + [pSZB585]	Fig 2-Fig Supp 1A
SZY3262	Sc	h90, leu1-32::LEU1:adh1pr:Z3EV, lys4-::LexA-wtf4antidote-mCherry::hphmx6::lys4-, his5+::sec63-YFP::his5+	this study	from a cross between SZY1277 and SZY2740	Fig 1-Fig Supp 3B
SZY3308	Sc	MATa, ura3-1, his3-11,15, leu2-3,112, trp1-1, PACT1-LexA-ER-haB42::HIS3, [pGAL-SIS1::URA3], [Empty Vector::LEU2], [LexA-wtf4poison-mEos3.1::TRP1]	this study	SZY3116 + pSZB732 + pRS315	Fig 2-Fig Supp 4
SZY3310	Sc	MATa, ura3-1, his3-11,15, leu2-3,112, trp1-1, PACT1-LexA-ER-haB42::HIS3, [pGAL-SIS1::URA3], [Empty Vector::LEU2], [Empty Vector::TRP1]	this study	SZY3116 + pRS314 + pRS315	Fig 2-Fig Supp 4
SZY3312	Sc	MATa, ura3-1, his3-11,15, leu2-3,112, trp1-1, PACT1-LexA-ER-haB42::HIS3, [pGAL-JJJ2::URA3], [Empty Vector::LEU2], [LexA-wtf4poison-mEos3.1::TRP1]	this study	SZY3118+ pSZB732 + pRS315	Fig 2-Fig Supp 4
SZY3314	Sc	MATa, ura3-1, his3-11,15, leu2-3,112, trp1-1, PACT1-LexA-ER-haB42::HIS3, [pGAL-JJJ2::URA3], [Empty Vector::LEU2], [Empty Vector::TRP1]	this study	SZY3118 + pRS314 + pRS315	Fig 2-Fig Supp 4
SZY3316	Sc	MATa, ura3-1, his3-11,15, leu2-3,112, trp1-1, PACT1-LexA-ER-haB42::HIS3, [pGAL-YDJ1::URA3], [Empty Vector::LEU2], [LexA-wtf4poison-mEos3.1::TRP1]	this study	SZY3120+ pSZB732 + pRS315	Fig 2-Fig Supp 4
SZY3318	Sc	MATa, ura3-1, his3-11,15, leu2-3,112, trp1-1, PACT1-LexA-ER-haB42::HIS3, [pGAL-YDJ1::URA3], [Empty Vector::LEU2], [Empty Vector::TRP1]	this study	SZY3120 + pRS314 + pRS315	Fig 2-Fig Supp 5
SZY3320	Sc	MATa, ura3-1, his3-11,15, leu2-3,112, trp1-1, PACT1-LexA-ER-haB42::HIS3, [pGAL-HSP42::URA3], [Empty Vector::LEU2], [LexA-wtf4poison-mEos3.1::TRP1]	this study	SZY3122+ pSZB732 + pRS315	Fig 2-Fig Supp 5
SZY3322	Sc	MATa, ura3-1, his3-11,15, leu2-3,112, trp1-1, PACT1-LexA-ER-haB42::HIS3, [pGAL-HSP42::URA3], [Empty Vector::LEU2], [Empty Vector::TRP1]	this study	SZY3122 + pRS314 + pRS315	Fig 2-Fig Supp 5
SZY3324	Sc	MATa, ura3-1, his3-11,15, leu2-3,112, trp1-1, PACT1-LexA-ER-haB42::HIS3, [pGAL-HSP82::URA3], [Empty Vector::LEU2], [LexA-wtf4poison-mEos3.1::TRP1]	this study	SZY3124+ pSZB732 + pRS315	Fig 2-Fig Supp 5
SZY3326	Sc	MATa, ura3-1, his3-11,15, leu2-3,112, trp1-1, PACT1-LexA-ER-haB42::HIS3, [pGAL-HSP82::URA3], [Empty Vector::LEU2], [Empty Vector::TRP1]	this study	SZY3124 + pRS314 + pRS315	Fig 2-Fig Supp 5
SZY3328	Sc	MATa, ura3-1, his3-11,15, leu2-3,112, trp1-1, PACT1-LexA-ER-haB42::HIS3, [pGAL-HSC82::URA3], [Empty Vector::LEU2], [LexA-wtf4poison-mEos3.1::TRP1]	this study	SZY3126+ pSZB732 + pRS315	Fig 2-Fig Supp 5
SZY3330	Sc	MATa, ura3-1, his3-11,15, leu2-3,112, trp1-1, PACT1-LexA-ER-haB42::HIS3, [pGAL-HSC82::URA3], [Empty Vector::LEU2], [Empty Vector::TRP1]	this study	SZY3126 + pRS314 + pRS315	Fig 2-Fig Supp 5
SZY3334	Sc	MATa, ura3-1, his3-11,15, leu2-3,112, trp1-1, PACT1-LexA-ER-haB42::HIS3, [Empty Vector::URA3], [LexA-wtf4poison-mEOS::TRP1], [Empty Vector::LEU2]	this study	SZY2072 + [pRS315]	Fig 2-Fig Supp 5
SZY3774	Sc	MATa, ura3-1, his3-11,15, leu2-3,112, trp1-1, PACT1-LexA-ER-haB42::HIS3, [Empty Vector::URA3], [Empty Vector::TRP1], [Empty Vector::LEU2]	this study	SZY1821 + [pRS315]	Fig 2-Fig Supp 4
SZY3816	Sc	MATa, ura3-1, his3-11,15, leu2-3,112, trp1-1, ade2-, lys2-, htb2-mCherry::hphmx6, [pGAL-wtf4poison-GFP::URA3] [Empty Vector::LEU2]	this study	SLJ3340 + [pSZB464]	Fig 2-Fig Supp 2C
SZY3928	Sc	MATa, ura3-1, his3-11,15, leu2-3,112, trp1-1, PACT1-LexA-ER-haB42::HIS3, [pGAL-GFP-ATG8::URA3]	this study	SZY1637 + [GFP-ATG8(416)/GFP-AUT7(416)]	Fig 5-Fig Supp 2B
SZY3962	Sc	MATa, ura3-1, his3-11,15, leu2-3,112, trp1-1, PACT1-LexA-ER-haB42::HIS3, [pGAL-GFP-ATG8::URA3], [pGAL-wtf4antidote-mCherry::LEU2]	this study	SZY3928 + [pSZB1005]	Fig 5-Fig Supp 1C
SZY4423	Sc	MATa, ura3-1, his3-11,15, leu2-3,112, trp1-1, PACT1-LexA-ER-haB42::HIS3, [pGAL-GFP-ATG8::URA3], [Empty Vector::LEU2]	this study	SZY3928 + [pRS315]	Fig 5-Fig Supp 2A
Sc= Saccharomyces cerevisiae Sp= Schizosaccharomyces pombe				All transformations used 'sleazy' protocol except for those marked * which used standard lithium acetate protocol (see methods)
