# Supplementary material for: The wtf4 meiotic driver utilizes controlled protein aggregation to generate selective cell death
Source: eLife. 2020 Oct 27;9:e55694. doi: 10.7554/eLife.55694 (PMC7591262; doi:10.7554/eLife.55694)
Supplement: Supplementary file 2. — Column 1 is the name of plasmid used, while column 2 describes the content of the plasmid. Columns 3 lists the reference for each plasmid. [file elife-55694-supp2.xlsx]

## Sheet: BUGS_smaller
plasmids used
plasmid	description	Reference
P03233DS	pBT3-STE::LEU2, bait vector Y2H	DUALsystems Biotech
RH027	Hsp104	from the Halfmann lab
RH14193	pGAL-GFP::LEU2	from the Halfmann lab
V08_mC	pGAL-mCardinal::LEU2	from the Halfmann lab
FRP718	PACT1-LexA-ER-haB42::HIS3	Ottoz et al., 2014
FRP1642	PTEF-TTEF-insul-4LEXABOX-pCYC1::hphMX6	Ottoz et al., 2014
GFP-ATG8(416)/GFP-AUT7(416)	GFP-ATG8::URA3	Guan et al., 2001
pDK20	pGAL::URA3	DasGupta et al., 1998
pDK412	pGAL-RNQ1-RFP::LEU2	D. Kryndushkin et al., 2012
pFS461	adh1pr:Z3EV::Leu1+	Ohira et al., 2017
pFS478	kanMX4::pZ3EV	Ohira et al., 2017
pRS314	Empty Vector::TRP1	Sikorski et al., 1989
pRS315	Empty Vector::LEU2	Sikorski et al., 1989
pRS316	Empty Vector::URA3	Sikorski et al., 1989
pSJ883	HDEL-DsRed::TRP1	Friederichs et al., 2011
pYM41	pFA6-eYFP-his3MX6	Janke et al., 2004
pSZB188	Empty Vector::kanMX4::ade6-	Nuckolls et al., 2017
pSZB199	wtf4 (codingsequence)::kanMX4::ade6-	this study
pSZB203	wtf4-GFP::kanMX4::ade6-	Nuckolls et al., 2017
pSZB248	mcherry-wtf4::kanMX4::ade6-	Nuckolls et al., 2017
pSZB257	wtf4poison-GFP::kanMX4::ade6-	Nuckolls et al., 2017
pSZB260	wtf4antidote-GFP::kanMX4::ade6-	this study
pSZB322	Empty Vector::hphMX6::lys4-	Bravo Núñez et al., 2018
pSZB331	Empty Vector::kanMX4::ura4-	Bravo Núñez et al., 2020
pSZB386	Empty Vector::hphMX6::ade6-	Bravo Núñez et al., 2018
pSZB388	pBT3-STE-wtf4poison::LEU2	this study
pSZB392	pGAL-wtf4poison::URA3	this study
pSZB464	pGAL-wtf4poison-GFP::URA3	this study
pSZB463	pGAL-wtf4poison-GFP::TRP1	this study
pSZB497	pGAL-wtf4antidote::TRP1	this study
pSZB585	LexA-wtf4poison-GFP::URA3	this study
pSZB589	LexA-wtf4antidote::TRP1	this study
pSZB647	wtf4*-GFP::ade6-::hphMX6	this study
pSZB668	LexA-Empty Vector::TRP1	this study
pSZB670	LexA-Empty Vector::URA3	this study
pSZB700	LexA-mCherry-wtf4antidote::TRP1	this study
pSZB708	LexA-wtf4antidote-mCherry::TRP1	this study
pSZB732	LexA-wtf4poison-mEOS::TRP1	this study
pSZB756	LexA-wtf4antidote-mEOS::URA3	this study
pSZB774	LexA-wtf4antidote*-mCherry::TRP1	this study
pSZB782	LexA-wtf4antidote::URA3	this study
pSZB786	LexA-wtf4poison*-GFP::URA3	this study
pSZB898	pGAL-mCardinal::LEU2	this study
pSZB891	wtf4 (coding sequence)-mCherry::kanMX4::ura4-	this study
pSZB892	LexA-wtf4antidote-mCherry::lys4-::hphMX6	this study
pSZB942	LexA-RNQ1-mCardinal::LEU2	this study
pSZB975	LexA-wtf4poison-GFP::ura4-::kanMX4	this study
pSZB992	LexA-wtf4antidoteΔ1-36-mCherry::TRP1	this study
pSZB997	pGal-HSP104::LEU2	this study
pSZB1005	pGAL-wtf4antidote-mCherry::LEU2	this study
pSZB1019	pGAL-SIS1::URA3	this study
pSZB1021	pGAL-JJJ2::URA3	this study
pSZB1020	pGAL-YDJ1::URA3	from the Si Lab Li et al., 2016
pSZB1024	pGAL-HSP42::URA3	from the Si Lab Li et al., 2016
pSZB1023	pGAL-HSP82::URA3	from the Si Lab Li et al., 2016
pSZB1022	pGAL-HSC82::URA3	from the Si Lab Li et al., 2016
pSZB1055	LexA-wtf4antidoteΔ1-41-mCherry::TRP1	this study
pSZB1120	pGAL-wtf4antidote-mEos::URA3	this study
rhx1389	pGAL-wtf4poison-mEos::URA3	this study
