# Supplementary material for: The wtf4 meiotic driver utilizes controlled protein aggregation to generate selective cell death
Source: eLife. 2020 Oct 27;9:e55694. doi: 10.7554/eLife.55694 (PMC7591262; doi:10.7554/eLife.55694)
Supplement: Supplementary file 3. — Column 1 lists the oligo numbers and column 2 provides the sequence of the oligo. Columns 3 gives a short description of each oligo. [file elife-55694-supp3.xlsx]

## Sheet: OLIGOS
oligos used
oligo	sequence	description
604	CTGAATATGGAGGCAATGTGCTCTCATC	Reverse, in wtf4 exon 1
605	ATGAAGAATAAAGATTATCCCTTGAGGTCGTCTATGG	Forward, start of wtf4 exon 1
606	TAAACCAGCACCGTCACCGACTTCGCTTTCAACTTCCATTTCCCCC	Reverse, in wtf4 without stop and tail of eGFP
620	AATATAGGAGCTCAGAAATTCAGTGTCATGTCAGCTACGCAG	upstream of wtf4, with SacI tail
613	GTGCCAACGATAATAATGACATTCCCTTGG	Forward, upstream of wtf4
614	TTA GACTTCGCTTTCAACTTCCATTTCCC	Reverse, the end of wtf4, with SacI tail
633	AATATAGAGCTCAGAAATTCAGTGTCATGTCAGCTACGCAG	Forward, upstream of wtf4, with SacI tail
634	AATATAGAGCTCCGGGGACGAGGCAAGCTAAAC	Reverse, to amplify ADH1 terminator, with SacI tail
635	AATATAGAGCTCTGGTTAAGCATGTGATCTTCATACGACGC	Reverse, downstream of wtf4, with SacI tail
678	GCCGAATATCGACTTCTCCAACGGG	Reverse, in wtf4 exon 2
679	GTATCTGAGGATTCAAGTACAGGACCTACAG	Forward, in wtf4 exon 2
686	AATATAGGAGCTCTATAATAGATCACAAAGGAAAACTCGCCGCAG	Reverse, downstream of wtf4, with SacI tail
687	AATATAGGAGCTCCTGCGTAGCTTACATGTTATTGCGATAACATTTCG	Reverse, downstream of wtf4, with SacI tail
688	AATATAGGAGCTCGGAAAGCTAAGTTGGGGTGAATAAAAAGGGC	upstream of wtf4, with SacI tail
719	CTCAATTCATCCATAGACGACCTCAAGGG	Reverse, in wtf4 exon 1
735	CCAAATTTCAAAAGTTATTTATTTTATTATACCTTTCAGAAATTTGGAAATATATTAAAACTGTATCTGAAG	Forward, within intron 1, with mutation for start site
736	CTTCAGATACAGTTTTAATATATTTCCAAATTTCTGAAAGGTATAATAAAATAAATAACTTTTGAAATTTGG	Reverse, within intron 1, with mutation for start site
916	ATTAACAAGGCCATTACGGCCATGCTTTCAGAAATTTGGAAATATATTAAAACTGTATCTGAG	Forward, start of wtf4poison , with SfiI tail
926	AACTGATTGGCCGAGGCGGCCGGTTAGACTTCGCTTTCAACTTCCATTTCCCCCAAGGGAATGTCATTATTATCGTTGGCACCTCTAAACGCTCTCCCTATATTCCCTATACCTTCTAGGAAAGAAGCTATACCATTCC	Reverse, end of wtf4poison , with SfiI tail
939	CAAGGAATTAACTTCGTTGGTGCCAAATG	Forward, upstream of the stop codon of sec63
941	AACCCGGGGATCCGTCGACCTTCTCCATCAGAAGTGTCAGTATCCATAGGGTCATATTCC	Reverse, downstream of the stop codon of sec63-YFP with HIS3MX tail
943	CACATTCAGAAAAAAATGGATTAGTCATGACGCATGGTATCGATGAATTCGAGCTCG	Reverse, to amplify either mTur_URA3MX or YFP_HIS3MX with sec63 tail
944	GAATATGACCCTATGGATACTGACACTTCTGATGGAGAAGGTCGACGGATCCCCGGGTT	Forward, to amplify YFP_HIS3MX, with sec63 tail
945	CGAGCTCGAATTCATCGATACCATGCGTCATGACTAATCCATTTTTTTCTGAATGTGT	Forward, region downstream of the stop codon of sec63
946	ATGTAACTTTGTAATGATAGATTCAATCAAATTCCAGTTCTC	Reverse, region downstream of the stop codon of sec63
963	AAATCTCTCGAGATGCTTTCAGAAATTTGGAAATATATTAAAACTGTATCTGAGG	Forward, in wtf4poison, with XhoI tail
964	AAATCTGGATCCGCAAATTAAAGCCTTCGAGCGTCCCAAAACC	Reverse, amplifies CYCI terminator, with BamHI tail
997	CCCAAGGGAATGTCATTATTATCGTTGGC	Reverse, in wtf4 exon 6
998	GCCAACGATAATAATGACATTCCCTTGGG	Forward, in wtf4 exon 6
1021	CACATTGTGCCAAGAAAATTACAGTC	Reverse, in wtf4 exon 3
1040	AATATAGGATCCCGGGGACGAGGCAAGCTAAAC	Reverse, amplifies ADHI terminator, with BamHI tail
1045	AACAATTTCACACAGGAAACAGCTATGACC	Forward, upstream of GAL1/GAL10
1065	AAATCTCTCGAGATGAAGAATAAAGATTATCCCTTGAGGTCGTCTATGG	Forward, start of wtf4 exon 1, with XhoI tail
1066	AAATCTCTCGAGATGGTGAGCAAGGGCGAGGAG	Forward, at the beginning of mCherry, with XhoI tail
1072	TGTATAAAGGTGACTGTAATTTTCTTGGC	Forward, in wtf4 exon 3
1136	GTTAAATTAAACCAGCACCGTCACCCTGAATATGGAGGCAATGTGCTCTCATC	Reverse, in wtf4 exon 1, with a tail of linker sequence
1137	GATGAGAGCACATTGCCTCCATATTCAGGGTGACGGTGCTGGTTTAATTTAAC	Forward, in linker sequence, with a tail of wtf4 exon 1 sequence
1195	TATATGGTACCGCCGCCATCCAGTGTTTAAAC	Forward, in LexA promoter, with KpnI tail
1240	TATATCTCGAGTATCGAATTCCTGCAGCCCG	Reverse, in LexA promoter, with XhoI tail
1280	CCCTCCAAATGCATTTCCTATCCCTCCAAATGCATTCCCTATACCTTCTAGGAAAGAAGC	Reverse, in wtf4 exon 6, has extra repeat sequence
1281	ATTTGGAGGGATAGGAAATGCATTTGGAGGGATAGGAAATGCAATTGGGCGGATAGGGAG	Forward, in wtf4 exon 6, has extra repeat sequence
1326	AAATCTGGATCCATGGTGAGCAAGGGCGAGGAG	Forward, at the beginning of mCherry, with BamHI tail
1339	ATGTCTAAAGGTGAAGAATTATTCACTGG	Forward, start of eGFP
1398	CTCGGCCCCATGGTAAGTAGCTAACCGCGGAGCGCTGACGTCAGACTTAATAGGT	Forward, in CYCI terminator, with a tail of mCherry sequence
1399	TTAGCTACTTACCATGGGGCCGAGGCGGCCTTACTTGTACAGCTCGTCCATGCCGCCGGTG	Reverse, in mCherry, with a tail of CYCI terminator sequence
1400	AAGCGAAGTCGGTGGAGGCGGTGGGATGGTGAGCAAGGGCGAGGAGGATAA	Forward, in mCherry, with a tail of linker-wtf4 exon 6 sequence

## Sheet: OLIGOS (2)
oligos used
oligo	sequence	description
945	CGAGCTCGAATTCATCGATACCATGCGTCATGACTAATCCATTTTTTTCTGAATGTGT	Forward, region downstream of the stop codon of sec63
946	ATGTAACTTTGTAATGATAGATTCAATCAAATTCCAGTTCTC	Reverse, region downstream of the stop codon of sec63
963	AAATCTCTCGAGATGCTTTCAGAAATTTGGAAATATATTAAAACTGTATCTGAGG	Forward, in wtf4poison, with XhoI tail
964	AAATCTGGATCCGCAAATTAAAGCCTTCGAGCGTCCCAAAACC	Reverse, amplifies CYCI terminator, with BamHI tail
997	CCCAAGGGAATGTCATTATTATCGTTGGC	Reverse, in wtf4 exon 6
998	GCCAACGATAATAATGACATTCCCTTGGG	Forward, in wtf4 exon 6
1021	CACATTGTGCCAAGAAAATTACAGTC	Reverse, in wtf4 exon 3
1040	AATATAGGATCCCGGGGACGAGGCAAGCTAAAC	Reverse, amplifies ADHI terminator, with BamHI tail
1045	AACAATTTCACACAGGAAACAGCTATGACC	Forward, upstream of GAL1/GAL10
1065	AAATCTCTCGAGATGAAGAATAAAGATTATCCCTTGAGGTCGTCTATGG	Forward, start of wtf4 exon 1, with XhoI tail
1066	AAATCTCTCGAGATGGTGAGCAAGGGCGAGGAG	Forward, at the beginning of mCherry, with XhoI tail
1072	TGTATAAAGGTGACTGTAATTTTCTTGGC	Forward, in wtf4 exon 3
1136	GTTAAATTAAACCAGCACCGTCACCCTGAATATGGAGGCAATGTGCTCTCATC	Reverse, in wtf4 exon 1, with a tail of linker sequence
1137	GATGAGAGCACATTGCCTCCATATTCAGGGTGACGGTGCTGGTTTAATTTAAC	Forward, in linker sequence, with a tail of wtf4 exon 1 sequence
1195	TATATGGTACCGCCGCCATCCAGTGTTTAAAC	Forward, in LexA promoter, with KpnI tail
1240	TATATCTCGAGTATCGAATTCCTGCAGCCCG	Reverse, in LexA promoter, with XhoI tail
1280	CCCTCCAAATGCATTTCCTATCCCTCCAAATGCATTCCCTATACCTTCTAGGAAAGAAGC	Reverse, in wtf4 exon 6, has extra repeat sequence
1281	ATTTGGAGGGATAGGAAATGCATTTGGAGGGATAGGAAATGCAATTGGGCGGATAGGGAG	Forward, in wtf4 exon 6, has extra repeat sequence
1326	AAATCTGGATCCATGGTGAGCAAGGGCGAGGAG	Forward, at the beginning of mCherry, with BamHI tail
1339	ATGTCTAAAGGTGAAGAATTATTCACTGG	Forward, start of eGFP
1398	CTCGGCCCCATGGTAAGTAGCTAACCGCGGAGCGCTGACGTCAGACTTAATAGGT	Forward, in CYCI terminator, with a tail of mCherry sequence
1399	TTAGCTACTTACCATGGGGCCGAGGCGGCCTTACTTGTACAGCTCGTCCATGCCGCCGGTG	Reverse, in mCherry, with a tail of CYCI terminator sequence
1400	AAGCGAAGTCGGTGGAGGCGGTGGGATGGTGAGCAAGGGCGAGGAGGATAA	Forward, in mCherry, with a tail of linker-wtf4 exon 6 sequence

## Sheet: OLIGOS (3)
oligos used
oligo	sequence	description
1401	TTATCCTCCTCGCCCTTGCTCACCATCCCACCGCCTCCACCGACTTCGCTT	Reverse, in linker-wtf4 exon 6, with a tail of mCherry sequence
1402	AAATCTCTCGAGATGAAGAATAAAGATTATCCCTTGAGGTCG	Forward, start of wtf4 exon 1, with XhoI tail
1419	AAATCTCTCGAGATGCTTTCTGAAATCTGGAAGTACATC	Forward, in wtf4 intron 1-exon 2 (wtf4poison start site), with XhoI tail
1465	AAATCTGGATCCATGAAGAACAAGGACTACCCCTTGAGATCT	Forward, start of wtf4 exon 1, with BamHI tail, codon optimized for S. cerevisiae
1466	AAATCTGGATCCATGCTTTCTGAAATCTGGAAGTACATC	Forward, in wtf4 intron 1-exon 2 (wtf4poison start site), with BamHI tail, codon optimized for S. cerevisiae
1712	CGTCGCTTTGCCATCAAGAGAACAACATA	Forward, upstream of VPS1
1713	GGACAAAAGATACTAGGATCGTAATGCGAG	Reverse, downstream of VPS1
1734	AATATAGGAGCTCACAGATCTCGCCATAAATTATATTG	Forward, start of Z3ez promoter, with SacI tail
1735	TCAAGGGATAATCTTTATTCTTCATGACGTTAAAGTATAGAGGTA	Reverse, in Z3ez promoter, with tail of wtf4 exon 1 sequence
1738	TACCTCTATACTTTAACGTCATGAAGAATAAAGATTATCCCTTGA	Forward, in wtf4 exon 1, with tail of Z3ez promoter sequence
1750	GCGGCATGGACGAGCTGTACAAGTAAGGCGCGCCACTTCTAAATA	Forward in downstream of wtf4, with a tail of mCherry sequence
1751	TATTTAGAAGTGGCGCGCCTTACTTGTACAGCTCGTCCATGCCGC	Reverse, in mCherry, with tail of downstream of wtf4 sequence
1831	GGCAACCAGAACCGCTACGGTGGAGGCGGTGGGATGGTTAGTAAAGGAGAAGAATTGATC	Forward in mCardinal, with a tail of linker-RNQ1 sequence
1832	GATCAATTCTTCTCCTTTACTAACCATCCCACCGCCTCCACCGTAGCGGTTCTGGTTGCC	Reverse, in RNQ1-linker, with tail of mCardinal sequence
1833	TAAATTACTATACTTCTATACTAGTCCCGGGCTGCAGGAATTCGATACTCGAGATGGATACGGATAAGTTAATCTCAGAGGCTGAG	Forward, in RNQ1 with a tail of LexA promoter sequence
1834	CTCAGCCTCTGAGATTAACTTATCCGTATCCATCTCGAGTATCGAATTCCTGCAGCCCGGGACTAGTATAGAAGTATAGTAATTTA	Reverse, in LexA promoter, with a tail of RNQ1sequence
1835	AAATCTGGATCCGCCGCCATCCAGTGTTTAAACGAAC	Forward, in LexA promoter, with BamHI tail
1850	TAATTCATCTATTTACTCCTAAAAAAGAAT	Forward, upstream of VPS1
1851	AGCTTCCACGTATACAAGAACAATATATAAGA	Reverse, downstream of VPS1
1915	GTCAATTTACCGTAAGTAGCATCACC	Reverse, in eGFP
1929	AAATCTGGATCCCGGATTAGAAGCCGCCGAGCGGGCG	Forward in GAL1/GAL10 promoter, with BamHI tail
2005	TATATCTCGAGATGGATGAGAGCACATTGCCTCCATATTCAGAAA	Forward in wtf4 exon 1, with Δ 1-36, with Xho1 tail
2037	GGGAAACCAGTTCGTGTAGAACTTTCTGCTG	Forward, upstream of sec63
2038	CACCAAACAATCGAGAATGAAACATTGGGC	Reverse, downstream of sec63
2046	TATATCTCGAGATGCCTCCATATTCAGAAATTTGGAAATATATT	Forward in wtf4 exon 1, with Δ1-41, with Xho1 tail
2068	TACAGTTTTAATATANTTTCCAAATTTCTGAAAGCATGACGTTAAAGTATAGAGGTATATTAACAATTTTTTGT	Reverse, in Lexa promoter sequence, with a tail of wtf4 intron 1-exon 2 sequence
2069	ACAAAAAATTGTTAATATACCTCTATACTTTAACGTCATGCTTTCAGAAATTTGGAAANTATATTAAAACTGTA	Forward, in wtf4 intron 1-exon 2 (alternate start site), with a tail of Lexa promoter sequence
rh1282	TCTGAAATCTGGAAGTACATCAAGAC	To insert exon 1 into wtf4poison with Gibson Assembly
rh1283	CTTAGACATTTTTACTAGTTCTAGAATCCG	To insert exon 1 into wtf4poison with Gibson Assembly
